# Supplementary material for: Dynamic Modeling of Cell Migration and Spreading Behaviors on Fibronectin Coated Planar Substrates and Micropatterned Geometries
Source: PLoS Comput Biol. 2013 Feb 28;9(2):e1002926. doi: 10.1371/journal.pcbi.1002926 (PMC3585413; doi:10.1371/journal.pcbi.1002926)
Supplement: Text S1 — Why the net force is zero in a dynamic moving system? (DOCX) [file pcbi.1002926.s006.docx]

**Text S1**

**Why the net force is zero in a dynamic moving system?**

We calculated , , and , and compared approximated value of the inertia term ,, with selected external forces terms of and in the following:

(S1)

where is a density of the cell (1040 [kg/m3]), is a volume of spherical section, which is divided by total number of nodes (*N*=549), and *R* is a radios of spherical cell (8 μm).

Time-averaged and for three hours are calculated as 4.24 nm/s and 3.18×10-4 nm/s2 (**Figure S2**) respectively. , =300×10-12 [N], =.

Thus, we found << or <<. In this approach, we assumed . Thereby, the net force is zero in a dynamic moving system.
